# Supplementary material for: Analysis of Expression Pattern of snoRNAs in Human Cells A549 Infected by Influenza A Virus
Source: MDPI journal article supplement (doi:10.3390/ijms232213666), 2022-11-08
Supplement: s1 [file s1]

**Table S1.** Oligonucleotide primers for RT-qPCR.

| RT-qPCR               |                  |                                                      |
|-----------------------|------------------|------------------------------------------------------|
| Target                | Name             | Sequence (5' – 3')                                   |
| U6 snRNA              | U6_snRNA_for     | TCGCTTCGGCAGCACATATACTAAAAT                          |
|                       | U6_snRNA_rev     | GAATTTGCGTGTCATCCTTGCG                               |
| U11 snRNA             | U11_snRNA_for    | AAGGCTTCTGTCGTGAGTGGCACA                             |
|                       | U11_snRNA_rev    | GGCGCCGGGACCAACGA                                    |
| SNORD42A              | F_sno42a         | CACGCAGGCTAATGATGG                                   |
|                       | R_sno42a         | CTTCAGTGGTTCCTTTGTTTCATGTC                           |
| SNORD58A              | F_sno58a         | GCAGTGATGACTTTCTTAGGAC                               |
|                       | R_sno58a         | GCTGCTCAGAATTTATTAATTTTCACGGT                        |
| SNORD79               | U79-f            | CTGTTAGTGATGATTTAA                                   |
|                       | U79-r            | CTGTTTCAGTTTAAGATT                                   |
| stem-loop RT-qPCR     |                  |                                                      |
| Target                | Name             | Sequence (5' – 3')                                   |
| All first strand cDNA | SL_R1            | GTGCAGGGTCCGAGGT                                     |
| SNORD1B and sdRNAs-1B | F_sno1b_5_mir    | CTGAGTCCATGATGATTTCAAG                               |
|                       | R_SL_sno1b_5_mir | GTCGTATCCAGTGCAGGGTCCGAGGTATTCGCACTGGATACGACCTTCAGAC |
|                       | F_sno1b_3_mir    | CACGCATTTCTGTGTGG                                    |
|                       | R_SL_sno1b_3_mir | GTCGTATCCAGTGCAGGGTCCGAGGTATTCGCACTGGATACGACTTTCAGAT |
| SNORD8 and sdRNAs-8   | F_sno8_5_mir     | TCCAATGATGAGTTGCCAT                                  |
|                       | R_SL_sno8_5_mir  | GTCGTATCCAGTGCAGGGTCCGAGGTATTCGCACTGGATACGACGCTCAGT  |
|                       | R_sno8           | CCCTCAGATCTTCATGTGAG                                 |

|                         |                  |                                                     |
|-------------------------|------------------|-----------------------------------------------------|
| SNORD11 and sdRNAs-11   | F_sno11_5_mir    | CACGCAGTTCAATGATGATTTC                              |
|                         | R_SL_sno11_5_mir | GTCGTATCCAGTGCAGGGTCCGAGGTATTCGCACTGGATACGACAATCAGG |
|                         | F_sno11_3_mir    | CACCAGGGCATCTTTAGTCAC                               |
|                         | R_SL_sno11_3_mir | GTCGTATCCAGTGCAGGGTCCGAGGTATTCGCACTGGATACGACTGTCTCA |
| SNORD93B and sdRNAs-93B | F_sno93_5_mir    | GCATGGCCAAGGATGAGAAC                                |
|                         | R_SL_sno93_5_mir | GTCGTATCCAGTGCAGGGTCCGAGGTATTCGCACTGGATACGACAATCAGA |
|                         | F_sno93_3_mir    | CACCGATCTGCTGTGATGG                                 |
|                         | R_SL_sno93_3_mir | GTCGTATCCAGTGCAGGGTCCGAGGTATTCGCACTGGATACGACTGGCCTC |

### 2'-O-methylation-specific RT-qPCR

| Target                | Name       | Sequence (5' – 3')     |
|-----------------------|------------|------------------------|
| 28S:Am3809 (SNORD79)  | Am_3809_F  | GCGCATGAATGGATGAACG    |
|                       | Am_3809_R  | CTGGATAGTAGGTAGGGACAG  |
|                       | Am_3809_In | ATGAATGGATGAACGAGATTCC |
| 28S:Gm4198 (SNORD58a) | Gm_4198_F  | GTCAAACGGTAACGCAGGT    |
|                       | Gm_4198_R  | GAGGTTTCTGTCCTCCCTG    |
|                       | Gm_4198_In | GTAACGCAGGTGTCCTAAGG   |
| 18S:Am576 (SNORD93)   | Am_576_F   | GACTCTTTTCGAGGCCCTGT   |
|                       | Am_576_R   | GCCCTCCAATGGATCCTC     |
|                       | Am_576_In  | GGAATGAGTCCACTTTAAATCC |
| 28S:Gm4362 (SNORD1b)  | Gm_4362_F  | GGTTTTAAGCAGGAGGTGTC   |
|                       | Gm_4362_R  | CGTCGCTATGAACGCTTG     |
|                       | Gm_4362_In | AGTTACCACAGGGATAACTGG  |

**Table S2.** Sequencing statistics of RNA-Seq. Samples Sm\_A549\_0h, Sm\_A549\_24h, Sm\_A549\_48h and pA\_A549\_0h, pA\_A549\_24h, pA\_A549\_48h include two biological replicates of small RNA and poly(A)+ RNA libraries respectively, of each time point (non-infected (0 h) and influenza-A/Puerto Rico/8/1934-infected (24 h and 48 h) A549 cells). Numbers of retrieved raw reads, reads after filtering (trimming of adapters, filtering by quality, removal of ribosomal RNA fragments) and uniquely mapped reads to GRCh38 and to Influenza A/Puerto Rico/8/1934 genomes are presented in table.

### Small RNA-Seq

| Sample      | Biological repeat | Total read number | After filtering reads | Uniquely mapped reads |                |
|-------------|-------------------|-------------------|-----------------------|-----------------------|----------------|
|             |                   |                   |                       | to hg38               | to Influenza A |
| Sm_A549_0h  | Sm_0h_1           | 5 876 508         | 4 545 646             | 3 772 700             | 10             |
|             | Sm_0h_2           | 6 455 310         | 5 254 025             | 4 371 753             | 7              |
| Sm_A549_24h | Sm_24h_1          | 6 875 150         | 5 463 196             | 4 355 639             | 59 786         |
|             | Sm_24h_2          | 6 405 753         | 5 092 667             | 3 943 561             | 57 272         |
| Sm_A549_48h | Sm_48h_1          | 6 551 298         | 4 956 558             | 3 246 757             | 69 033         |
|             | Sm_48h_2          | 6 095 045         | 4 509 835             | 2 957 440             | 63 165         |

### polyA-selected RNA-Seq

| Sample      | Biological repeat | Total read number | After filtering reads | Uniquely mapped reads |                |
|-------------|-------------------|-------------------|-----------------------|-----------------------|----------------|
|             |                   |                   |                       | to hg38               | to Influenza A |
| pA_A549_0h  | pA_0h_1           | 12 693 199        | 12 469 797            | 11 500 381            | 35             |
|             | pA_0h_2           | 10 610 878        | 10 411 687            | 9 598 270             | 323            |
| pA_A549_24h | pA_24h_1          | 11 457 333        | 11 015 053            | 9 102 079             | 994 175        |
|             | pA_24h_2          | 11 097 112        | 10 621 125            | 8 547 535             | 1 139 113      |
| pA_A549_48h | pA_48h_1          | 11 413 406        | 10 928 105            | 7 701 098             | 2 443 654      |
|             | pA_48h_2          | 11 604 763        | 11 135 881            | 7 732 196             | 2 597 907      |

**Table S3.** Differential expressed snoRNAs 24 h and 48 h after influenza A virus infection were identified using R package DESeq2 (v1.30.1) with a FDR-adjusted p -value < 0.05 and the absolute value of a log2(FC) > 0.58.

**Differential expressed snoRNAs 24 h after influenza A virus infection**

| Up              |             |          |         | Down            |             |          |         |
|-----------------|-------------|----------|---------|-----------------|-------------|----------|---------|
| Ensembl ID      | Gene symbol | log2(FC) | p.adj   | Ensembl ID      | Gene symbol | log2(FC) | p.adj   |
| ENSG00000221740 | SNORD93     | 4.30     | << 0.05 | ENSG00000206602 | SNORD58A    | -1.73    | 3.7E-30 |
| ENSG00000207297 | SNORD7      | 2.57     | 3.0E-28 | ENSG00000252542 | SNORD36C    | -1.39    | 5.2E-07 |
| ENSG00000201754 | SNORD52     | 1.93     | 1.3E-49 | ENSG00000271982 | SNORD58B    | -1.33    | 3.0E-22 |
| ENSG00000199961 | SNORD1B     | 1.48     | 1.1E-46 | ENSG00000200608 | SNORD114-11 | -1.28    | 3.3E-05 |
| ENSG00000200463 | SNORD118    | 1.47     | 2.8E-27 | ENSG00000207405 | SNORA64     | -1.13    | 3.4E-10 |
| ENSG00000200785 | SNORD8      | 1.08     | 8.6E-04 | ENSG00000206597 | SNORA57     | -1.01    | 4.0E-05 |
| ENSG00000277184 | SNORA9      | 1.07     | 8.9E-03 | ENSG00000202093 | SNORD58C    | -0.94    | 4.1E-15 |
| ENSG00000212443 | SNORA53     | 0.95     | 2.8E-02 | ENSG00000221491 | SNORA2C     | -0.92    | 9.4E-03 |
| ENSG00000249020 | SNORA58     | 0.88     | 8.5E-03 | ENSG00000264294 | SNORD55     | -0.83    | 1.6E-10 |
| ENSG00000275662 | SNORD112    | 0.82     | 2.4E-02 | ENSG00000207279 | SNORD116-24 | -0.78    | 3.9E-02 |
| ENSG00000199631 | SNORD33     | 0.80     | 2.8E-08 | ENSG00000264346 | SNORA77B    | -0.76    | 4.0E-02 |
| ENSG00000207280 | SNORD20     | 0.78     | 2.1E-06 | ENSG00000207145 | SNORA18     | -0.73    | 3.3E-05 |
| ENSG00000238622 | SNORD97     | 0.77     | 2.6E-02 | ENSG00000238649 | SNORD42A    | -0.69    | 1.4E-02 |
| ENSG00000206620 | SNORD45C    | 0.73     | 3.7E-03 | ENSG00000277512 | SNORD65     | -0.64    | 1.9E-06 |
| ENSG00000212158 | SNORD66     | 0.66     | 9.4E-06 | ENSG00000229686 | SNORD56     | -0.62    | 1.2E-04 |
| ENSG00000238317 | SNORD11     | 0.66     | 4.9E-03 | ENSG00000238597 | SNORD4B     | -0.62    | 2.7E-05 |
| ENSG00000221514 | SNORD111B   | 0.65     | 6.6E-05 | ENSG00000221066 | SNORD111    | -0.6     | 4.9E-04 |
| ENSG00000202503 | SNORD34     | 0.62     | 4.8E-03 | ENSG00000200913 | SNORD46     | -0.59    | 7.3E-05 |

## Differential expressed snoRNAs 48 h after influenza A virus infection

| Up              |             |          |          | Down            |             |          |          |
|-----------------|-------------|----------|----------|-----------------|-------------|----------|----------|
| Ensembl ID      | Gene symbol | log2(FC) | p.adj    | Ensembl ID      | Gene symbol | log2(FC) | p.adj    |
| ENSG00000277184 | SNORA9      | 5.66     | 1.5E-57  | ENSG00000206602 | SNORD58A    | -3.52    | 2.4E-118 |
| ENSG00000221740 | SNORD93     | 4.65     | << 0.05  | ENSG00000200608 | SNORD114-11 | -2.91    | 1.0E-16  |
| ENSG00000239183 | SNORA84     | 4.53     | 1.5E-08  | ENSG00000207001 | SNORD116-2  | -2.74    | 2.2E-04  |
| ENSG00000207297 | SNORD7      | 3.38     | 1.3E-49  | ENSG00000221491 | SNORA2C     | -2.72    | 9.7E-15  |
| ENSG00000238317 | SNORD11     | 3.24     | 5.9E-58  | ENSG00000271982 | SNORD58B    | -2.65    | 5.4E-82  |
| ENSG00000201772 | SNORA5C     | 3.23     | 1.3E-09  | ENSG00000252542 | SNORD36C    | -2.55    | 9.6E-18  |
| ENSG00000200463 | SNORD118    | 2.96     | 1.2E-112 | ENSG00000238961 | SNORA47     | -2.36    | 1.3E-07  |
| ENSG00000238363 | SNORA13     | 2.90     | 1.8E-11  | ENSG00000207145 | SNORA18     | -2.13    | 1.3E-36  |
| ENSG00000199785 | SNORA52     | 2.89     | 5.2E-05  | ENSG00000238917 | SNORD10     | -2.10    | 4.7E-08  |
| ENSG00000200983 | SNORA3A     | 2.87     | 2.9E-42  | ENSG00000238649 | SNORD42A    | -2.06    | 9.0E-15  |
| ENSG00000207067 | SNORA72     | 2.81     | 1.3E-08  | ENSG00000202093 | SNORD58C    | -2.01    | 5.8E-65  |
| ENSG00000249020 | SNORA58     | 2.74     | 2.8E-19  | ENSG00000206597 | SNORA57     | -1.96    | 2.4E-15  |
| ENSG00000202363 | SNORA62     | 2.66     | 5.2E-35  | ENSG00000207405 | SNORA64     | -1.96    | 1.3E-26  |
| ENSG00000201129 | SNORA58B    | 2.58     | 2.4E-08  | ENSG00000238597 | SNORD4B     | -1.93    | 4.6E-41  |
| ENSG00000206622 | SNORA69     | 2.57     | 1.3E-05  | ENSG00000207166 | SNORA68     | -1.90    | 5.4E-06  |
| ENSG00000209582 | SNORA48     | 2.37     | 6.5E-06  | ENSG00000264294 | SNORD55     | -1.89    | 1.1E-53  |
| ENSG00000200418 | SNORA63B    | 2.25     | 1.6E-03  | ENSG00000221066 | SNORD111    | -1.77    | 6.0E-27  |
| ENSG00000200785 | SNORD8      | 2.20     | 3.4E-13  | ENSG00000207496 | SNORA7A     | -1.75    | 4.0E-06  |
| ENSG00000238622 | SNORD97     | 2.18     | 6.3E-12  | ENSG00000229686 | SNORD56     | -1.70    | 5.6E-28  |
| ENSG00000199961 | SNORD1B     | 2.17     | 1.3E-99  | ENSG00000207088 | SNORA7B     | -1.62    | 2.3E-03  |
| ENSG00000207304 | SNORA8      | 2.17     | 9.4E-06  | ENSG00000207279 | SNORD116-24 | -1.57    | 9.3E-05  |
| ENSG00000221420 | SNORA81     | 2.16     | 7.8E-07  | ENSG00000277512 | SNORD65     | -1.54    | 9.2E-34  |
| ENSG00000235408 | SNORA71B    | 2.12     | 7.3E-05  | ENSG00000276788 | SNORD26     | -1.53    | 2.3E-21  |
| ENSG00000199593 | SNORD114-14 | 2.04     | 1.0E-03  | ENSG00000200913 | SNORD46     | -1.51    | 1.2E-26  |
| ENSG00000207445 | SNORD15B    | 2.02     | 3.8E-08  | ENSG00000207063 | SNORD116-1  | -1.49    | 5.7E-03  |

|                 |             |      |         |                 |             |       |         |
|-----------------|-------------|------|---------|-----------------|-------------|-------|---------|
| ENSG00000277194 | SNORD22     | 2.01 | 5.0E-11 | ENSG00000200480 | SNORD114-28 | -1.38 | 1.2E-02 |
| ENSG00000199293 | SNORA21     | 1.85 | 3.0E-14 | ENSG00000274582 | SNORA16A    | -1.38 | 4.3E-02 |
| ENSG00000206885 | SNORA75     | 1.83 | 2.0E-08 | ENSG00000280498 | SNORA16A    | -1.38 | 4.3E-02 |
| ENSG00000274998 | SNORA17A    | 1.82 | 1.8E-02 | ENSG00000254341 | SNORD87     | -1.31 | 9.4E-13 |
| ENSG00000207280 | SNORD20     | 1.67 | 2.4E-27 | ENSG00000221539 | SNORD99     | -1.28 | 4.2E-32 |
| ENSG00000212464 | SNORA12     | 1.67 | 4.2E-02 | ENSG00000275043 | SNORD25     | -1.28 | 1.2E-26 |
| ENSG00000206620 | SNORD45C    | 1.63 | 1.6E-12 | ENSG00000200406 | SNORD114-23 | -1.19 | 1.4E-03 |
| ENSG00000206941 | SNORD15A    | 1.63 | 2.5E-47 | ENSG00000200623 | SNORD18A    | -1.17 | 8.9E-19 |
| ENSG00000207493 | SNORA46     | 1.62 | 7.6E-05 | ENSG00000207093 | SNORD116-8  | -1.16 | 2.5E-07 |
| ENSG00000212135 | SNORD67     | 1.61 | 5.2E-04 | ENSG00000199744 | SNORD36A    | -1.12 | 4.0E-05 |
| ENSG00000274091 | SNORD1C     | 1.55 | 1.1E-20 | ENSG00000199575 | SNORD114-1  | -1.09 | 1.3E-03 |
| ENSG00000202270 | SNORD114-12 | 1.50 | 1.4E-05 | ENSG00000274544 | SNORD28     | -1.06 | 2.7E-04 |
| ENSG00000201754 | SNORD52     | 1.48 | 7.9E-30 | ENSG00000207442 | SNORD116-6  | -1.04 | 4.3E-02 |
| ENSG00000202503 | SNORD34     | 1.45 | 3.7E-13 | ENSG00000238344 | SNORD126    | -0.99 | 1.4E-12 |
| ENSG00000212232 | SNORD17     | 1.45 | 8.9E-29 | ENSG00000201823 | SNORD48     | -0.94 | 1.5E-17 |
| ENSG00000275084 | SNORD91B    | 1.33 | 5.3E-03 | ENSG00000264346 | SNORA77B    | -0.91 | 1.6E-02 |
| ENSG00000199631 | SNORD33     | 1.32 | 1.9E-21 | ENSG00000209482 | SNORD83A    | -0.88 | 4.5E-07 |
| ENSG00000275662 | SNORD112    | 1.25 | 4.5E-04 | ENSG00000207031 | SNORD59A    | -0.81 | 3.2E-11 |
| ENSG00000201240 | SNORD114-9  | 1.21 | 9.7E-08 | ENSG00000212304 | SNORD12     | -0.80 | 2.0E-12 |
| ENSG00000200354 | SNORA71D    | 1.18 | 5.2E-04 | ENSG00000221381 | SNORD88B    | -0.78 | 2.6E-05 |
| ENSG00000272533 | SNORA28     | 1.17 | 4.4E-02 | ENSG00000207392 | SNORA20     | -0.77 | 6.4E-04 |
| ENSG00000201302 | SNORA65     | 1.15 | 3.3E-03 | ENSG00000209702 | SNORD41     | -0.77 | 3.3E-02 |
| ENSG00000265145 | SNORD53     | 1.12 | 2.6E-03 | ENSG00000206680 | SNORD21     | -0.75 | 9.9E-11 |
| ENSG00000201998 | SNORA23     | 1.11 | 1.1E-02 | ENSG00000209042 | SNORD12C    | -0.70 | 8.1E-09 |
| ENSG00000200087 | SNORA73B    | 1.09 | 7.3E-03 | ENSG00000212607 | SNORA3B     | -0.69 | 1.9E-02 |
| ENSG00000278274 | SNORA61     | 1.08 | 4.0E-06 | ENSG00000277846 | SNORD30     | -0.68 | 4.6E-08 |
| ENSG00000207475 | SNORA80E    | 1.06 | 4.0E-02 | ENSG00000238531 | SNORD105B   | -0.67 | 3.8E-04 |
| ENSG00000207375 | SNORD116-23 | 1.03 | 3.0E-02 | ENSG00000208797 | SNORD73A    | -0.66 | 2.0E-02 |
| ENSG00000200831 | SNORD36B    | 1.01 | 2.6E-13 | ENSG00000212309 | SNORD70B    | -0.64 | 5.5E-03 |

|                 |             |      |         |
|-----------------|-------------|------|---------|
| ENSG00000212158 | SNORD66     | 0.97 | 1.2E-11 |
| ENSG00000277887 | SNORA50C    | 0.95 | 2.6E-03 |
| ENSG00000272344 | SNORD114-21 | 0.94 | 1.2E-02 |
| ENSG00000207118 | SNORD14D    | 0.92 | 5.3E-08 |
| ENSG00000212447 | SNORD90     | 0.91 | 2.1E-06 |
| ENSG00000208772 | SNORD94     | 0.77 | 6.5E-03 |
| ENSG00000200879 | SNORD14E    | 0.75 | 9.7E-03 |
| ENSG00000221116 | SNORD110    | 0.74 | 9.7E-03 |
| ENSG00000221514 | SNORD111B   | 0.69 | 2.0E-05 |
| ENSG00000265236 | SNORD84     | 0.69 | 4.4E-04 |
| ENSG00000207421 | SNORD38B    | 0.68 | 1.4E-05 |
| ENSG00000281859 | SNORD38B    | 0.68 | 1.4E-05 |
| ENSG00000239039 | SNORD13     | 0.63 | 7.5E-05 |

|                 |         |       |         |
|-----------------|---------|-------|---------|
| ENSG00000212452 | SNORD69 | -0.61 | 3.9E-06 |
| ENSG00000202314 | SNORD6  | -0.60 | 3.3E-06 |

**Table S4.** Differential expressed mature miRNAs 24 h and 48 h after influenza A virus infection were identified using R package DESeq2 (v1.30.1) with the baseMean > 10, FDR-adjusted p -value < 0.05 and the absolute value of a log2(FC) > 0.58.

**Differential expressed mature miRNAs 24 h after influenza A virus infection**

| Up              |          |          |         | Down              |          |          |         |
|-----------------|----------|----------|---------|-------------------|----------|----------|---------|
| miRBase ID      | baseMean | log2(FC) | p.adj   | miRBase ID        | baseMean | log2(FC) | p.adj   |
| hsa-miR-146a-5p | 27       | 4.69     | 1.8E-05 | hsa-miR-138-1-3p  | 14       | -2.66    | 4.8E-03 |
| hsa-miR-190b-5p | 43       | 4.14     | 3.3E-10 | hsa-miR-194-3p    | 18       | -2.64    | 1.2E-03 |
| hsa-miR-215-5p  | 157      | 3.65     | 2.4E-28 | hsa-miR-27b-5p    | 887      | -2.27    | 5.0E-64 |
| hsa-miR-200c-3p | 723      | 2.66     | 2.6E-71 | hsa-miR-365a-5p   | 56       | -2.06    | 5.3E-07 |
| hsa-miR-449c-5p | 45       | 2.36     | 9.0E-06 | hsa-miR-4521      | 38       | -1.95    | 9.2E-05 |
| hsa-miR-146b-5p | 1060     | 1.44     | 3.3E-27 | hsa-miR-125b-1-3p | 80       | -1.58    | 7.1E-06 |
| hsa-miR-139-5p  | 37       | 1.43     | 2.0E-02 | hsa-miR-23b-3p    | 2628     | -1.00    | 1.9E-13 |
| hsa-miR-450a-5p | 114      | 1.26     | 4.8E-05 | hsa-miR-25-5p     | 96       | -0.88    | 1.3E-02 |
| hsa-miR-212-5p  | 47       | 1.07     | 4.2E-02 | hsa-miR-424-3p    | 180      | -0.81    | 1.0E-03 |
| hsa-miR-615-3p  | 58       | 1.05     | 3.0E-02 | hsa-miR-370-3p    | 564      | -0.78    | 7.6E-06 |
| hsa-miR-132-5p  | 75       | 1.01     | 1.3E-02 | hsa-miR-941       | 433      | -0.78    | 3.0E-05 |
| hsa-miR-450b-5p | 262      | 0.86     | 4.8E-05 | hsa-miR-222-3p    | 11440    | -0.69    | 1.6E-06 |
| hsa-miR-148a-3p | 1148     | 0.81     | 7.3E-08 | hsa-miR-744-5p    | 422      | -0.66    | 2.1E-04 |
| hsa-miR-196b-5p | 337      | 0.75     | 9.2E-05 | hsa-miR-23a-3p    | 516      | -0.62    | 1.5E-04 |
| hsa-miR-10b-5p  | 3827     | 0.71     | 9.8E-11 | hsa-miR-224-5p    | 9543     | -0.60    | 1.1E-07 |
| hsa-miR-181a-5p | 947      | 0.67     | 5.0E-06 | hsa-miR-1307-3p   | 2106     | -0.59    | 1.1E-06 |
| hsa-miR-96-5p   | 897      | 0.62     | 2.1E-05 |                   |          |          |         |



## Differential expressed mature miRNAs 48 h after influenza A virus infection

| Up               |          |          |         | Down              |          |          |         |
|------------------|----------|----------|---------|-------------------|----------|----------|---------|
| miRBase ID       | baseMean | log2(FC) | p.adj   | miRBase ID        | baseMean | log2(FC) | p.adj   |
| hsa-miR-146a-5p  | 27       | 5.04     | 2.0E-06 | hsa-miR-138-1-3p  | 14       | -3.54    | 7.9E-04 |
| hsa-miR-215-5p   | 157      | 3.82     | 4.4E-31 | hsa-miR-29b-1-5p  | 15       | -3.33    | 1.1E-03 |
| hsa-miR-26a-2-3p | 14       | 3.73     | 1.4E-04 | hsa-miR-4521      | 38       | -3.16    | 2.8E-08 |
| hsa-miR-190b-5p  | 43       | 3.72     | 1.7E-08 | hsa-miR-365b-5p   | 11       | -2.97    | 9.9E-03 |
| hsa-miR-200c-3p  | 723      | 2.61     | 7.8E-68 | hsa-miR-194-3p    | 18       | -2.70    | 1.4E-03 |
| hsa-miR-449c-5p  | 45       | 2.19     | 4.3E-05 | hsa-miR-365a-5p   | 56       | -2.60    | 2.3E-09 |
| hsa-miR-146b-5p  | 1060     | 1.60     | 1.9E-33 | hsa-miR-27b-5p    | 887      | -2.55    | 7.1E-75 |
| hsa-miR-139-5p   | 37       | 1.51     | 1.0E-02 | hsa-miR-25-5p     | 96       | -2.39    | 1.0E-11 |
| hsa-miR-181a-5p  | 947      | 1.45     | 3.0E-27 | hsa-miR-539-5p    | 19       | -2.10    | 1.6E-02 |
| hsa-miR-132-5p   | 75       | 1.37     | 2.0E-04 | hsa-miR-195-3p    | 32       | -2.05    | 6.6E-04 |
| hsa-miR-19b-3p   | 132      | 1.32     | 1.2E-06 | hsa-miR-92a-1-5p  | 67       | -2.00    | 2.8E-06 |
| hsa-miR-450a-5p  | 114      | 1.23     | 8.2E-05 | hsa-miR-485-3p    | 38       | -1.94    | 1.1E-03 |
| hsa-miR-615-3p   | 58       | 1.21     | 8.4E-03 | hsa-miR-125b-1-3p | 80       | -1.88    | 1.3E-07 |
| hsa-miR-193b-3p  | 93       | 1.20     | 3.7E-04 | hsa-miR-27a-5p    | 617      | -1.75    | 4.6E-29 |
| hsa-miR-454-3p   | 49       | 1.17     | 2.2E-02 | hsa-miR-92b-5p    | 67       | -1.68    | 5.4E-05 |
| hsa-miR-212-5p   | 47       | 1.07     | 4.0E-02 | hsa-miR-3662      | 28       | -1.67    | 1.6E-02 |
| hsa-miR-29a-3p   | 2601     | 1.00     | 5.3E-14 | hsa-miR-320b      | 20       | -1.66    | 4.8E-02 |
| hsa-miR-181b-5p  | 603      | 0.98     | 1.1E-09 | hsa-miR-424-3p    | 180      | -1.66    | 1.0E-11 |
| hsa-miR-148a-3p  | 1148     | 0.90     | 7.6E-10 | hsa-miR-432-5p    | 40       | -1.37    | 1.2E-02 |
| hsa-miR-186-5p   | 927      | 0.90     | 2.9E-11 | hsa-let-7c-5p     | 855      | -1.36    | 2.0E-16 |
| hsa-miR-29b-3p   | 133      | 0.89     | 1.5E-03 | hsa-miR-7974      | 353      | -1.33    | 6.7E-12 |
| hsa-miR-181d-5p  | 230      | 0.73     | 1.2E-03 | hsa-let-7b-5p     | 6765     | -1.33    | 5.8E-27 |
| hsa-miR-450b-5p  | 262      | 0.68     | 2.1E-03 | hsa-miR-224-5p    | 9543     | -1.28    | 6.5E-34 |
| hsa-miR-10b-5p   | 3827     | 0.68     | 5.3E-10 | hsa-miR-23b-3p    | 2628     | -1.07    | 2.2E-15 |
| hsa-miR-221-3p   | 1958     | 0.68     | 4.2E-06 | hsa-miR-222-3p    | 11440    | -1.02    | 9.1E-14 |

|                |       |      |         |
|----------------|-------|------|---------|
| hsa-miR-30d-5p | 19433 | 0.64 | 1.1E-10 |
| hsa-miR-191-5p | 3746  | 0.64 | 8.7E-09 |
| hsa-miR-194-5p | 2096  | 0.60 | 2.8E-06 |
| hsa-miR-32-5p  | 576   | 0.60 | 2.9E-03 |
| hsa-miR-26a-5p | 31364 | 0.59 | 5.0E-09 |

|                  |      |       |         |
|------------------|------|-------|---------|
| hsa-miR-370-3p   | 564  | -0.99 | 5.9E-09 |
| hsa-miR-1304-5p  | 68   | -0.98 | 1.8E-02 |
| hsa-miR-1180-3p  | 687  | -0.97 | 4.0E-09 |
| hsa-miR-1307-3p  | 2106 | -0.95 | 1.4E-16 |
| hsa-miR-330-3p   | 251  | -0.95 | 6.9E-06 |
| hsa-miR-320a-3p  | 4482 | -0.95 | 3.0E-17 |
| hsa-miR-30c-2-3p | 109  | -0.80 | 1.5E-02 |
| hsa-miR-941      | 433  | -0.77 | 3.3E-05 |
| hsa-miR-134-5p   | 100  | -0.75 | 3.9E-02 |
| hsa-miR-425-5p   | 888  | -0.68 | 1.3E-06 |
| hsa-miR-409-3p   | 1184 | -0.64 | 1.1E-04 |

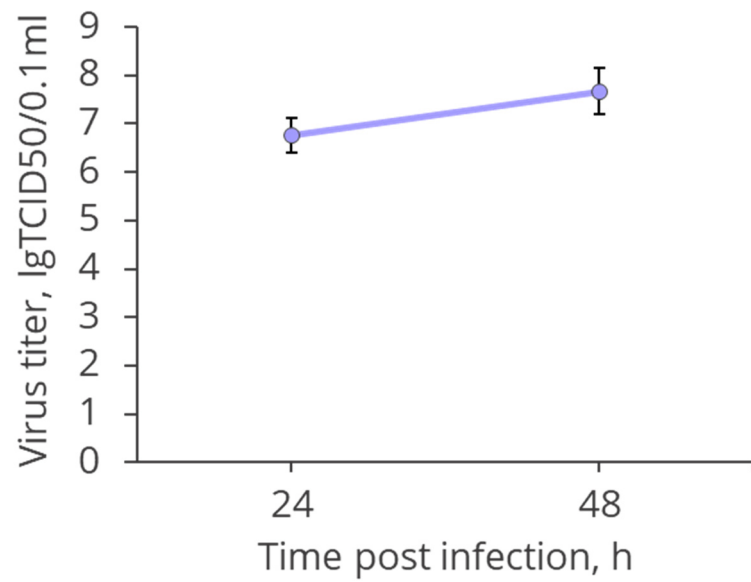

**Figure S1.** Growth kinetics of influenza A/Puerto Rico/8/1934 (H1N1) virus in A549 cell line. At the indicated time points post infection, virus titers were determined by use of plaque assays in MDCK cells. Values shown are the means ( $\pm$  s.d.) of three independent experiments.

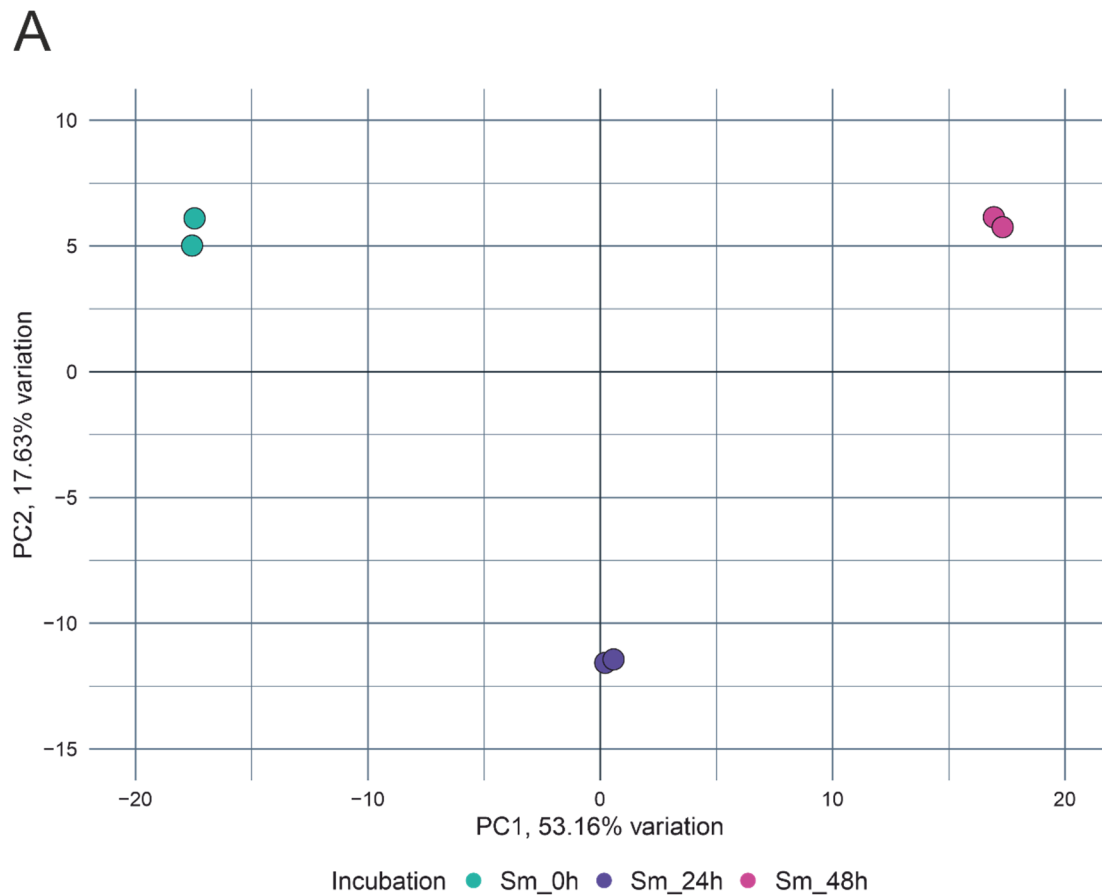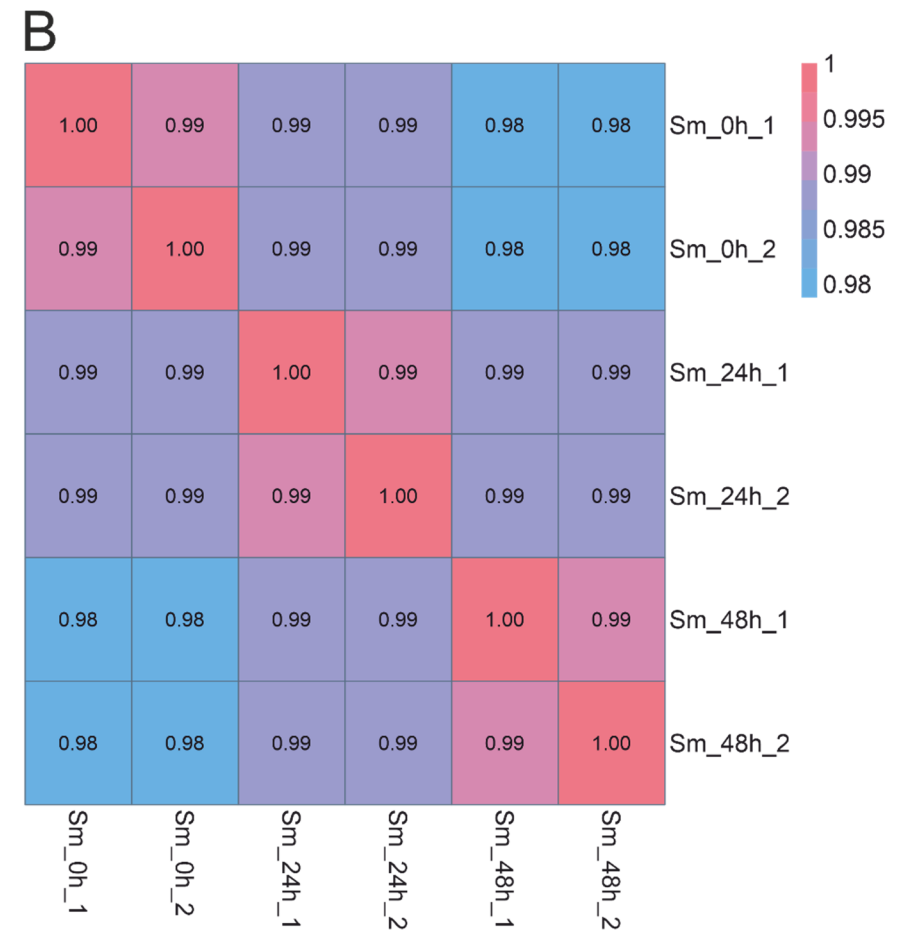

**Figure S2.** Differential gene expression analysis of 6 cDNA libraries for small RNA fraction. **A.** Principal component analysis (PCA). Each dot represents one biological repeat. **B.** Heatmap plots showing sample-to-sample correlations.

**A**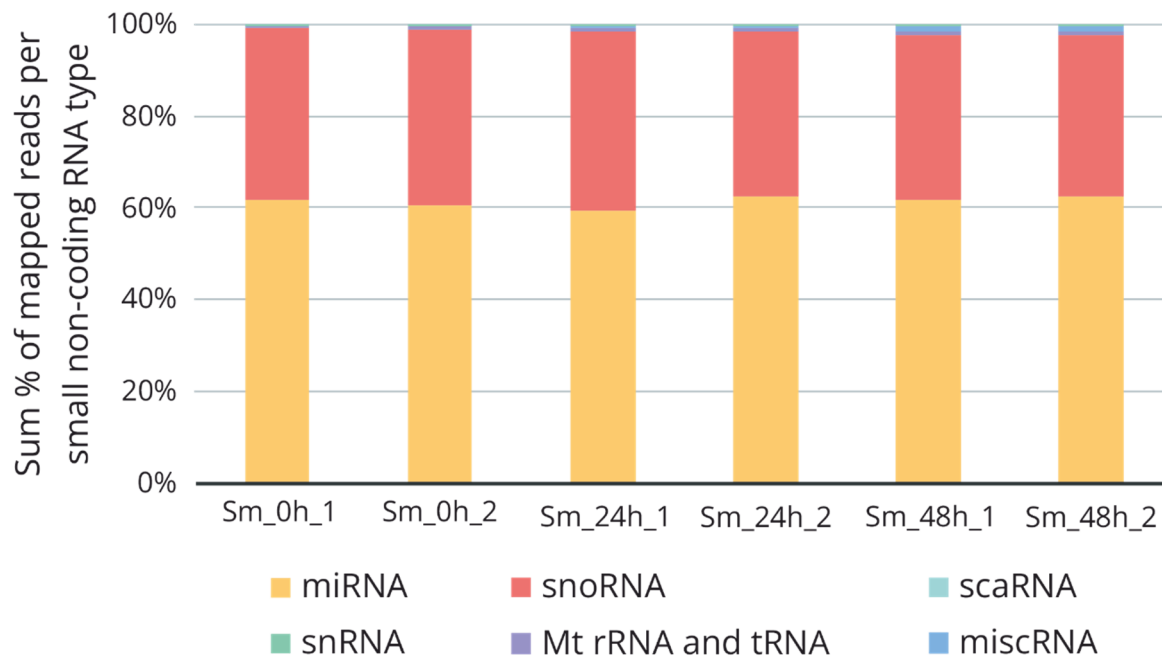**B**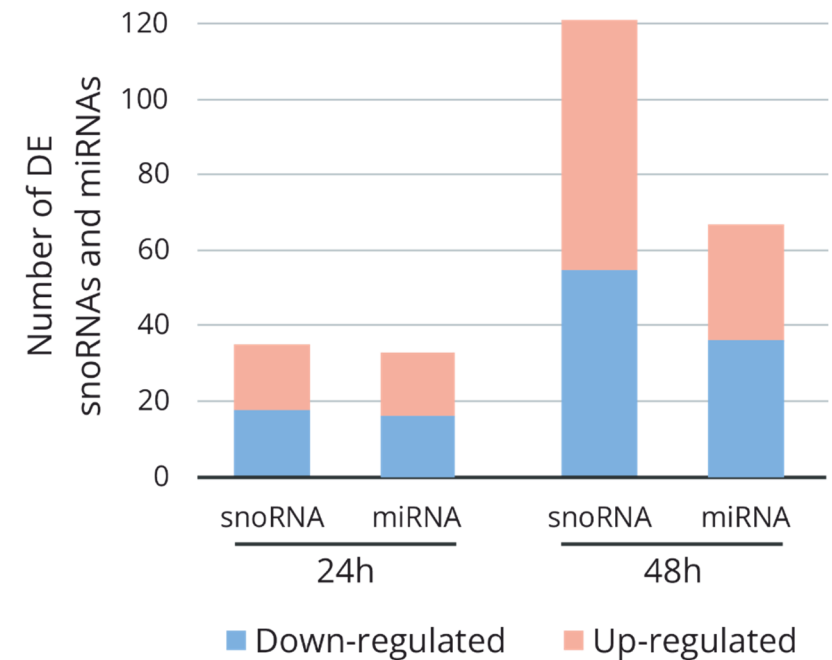

**Figure S3. A.** Relative abundance of different small non-coding RNA types (miRNA, snoRNA, scaRNA, snRNA, Mt rRNA and tRNA, miscRNA) per small RNA library. **B.** Diagrams show the number of up-regulated and down-regulated (differentially expressed (DE)) snoRNAs and miRNAs 24 h and 48 h after influenza A virus infection (FDR-adjusted p-value < 0.05, absolute value of a log<sub>2</sub> (FC) > 0.58).

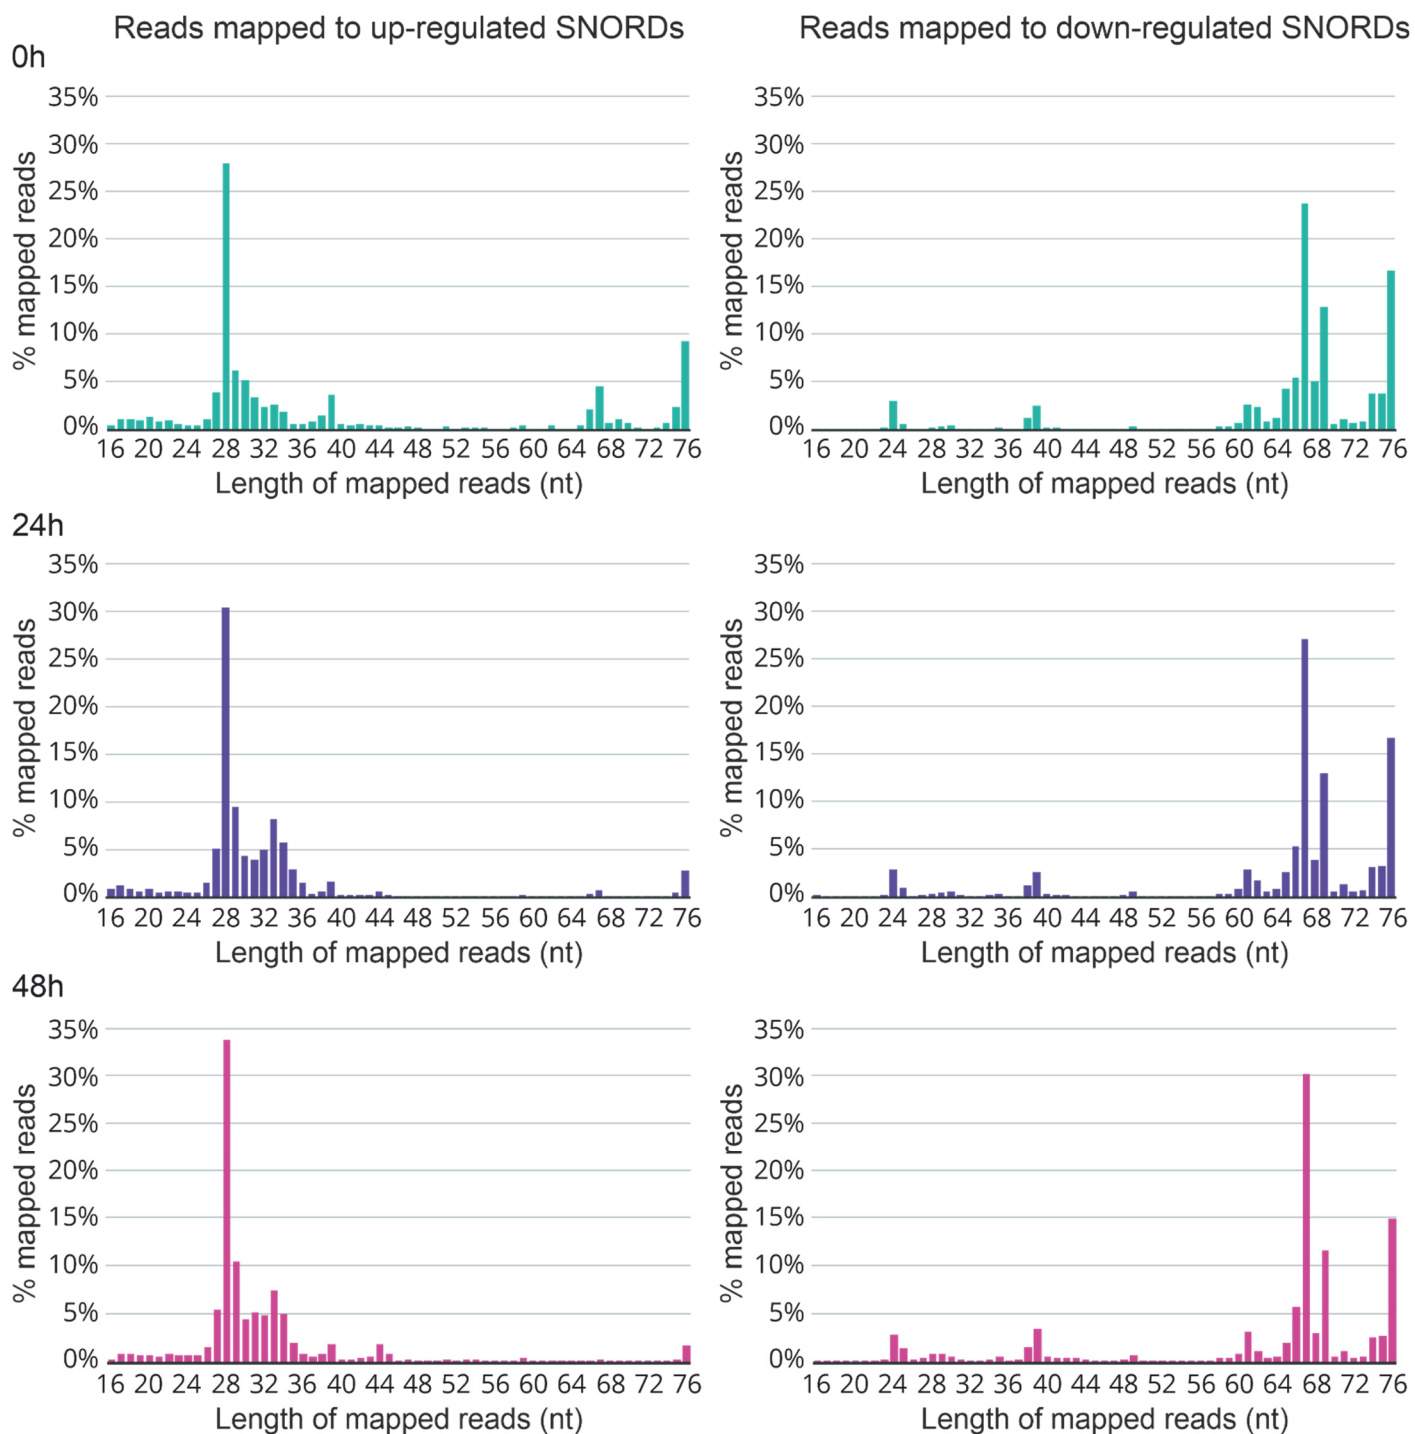

**Figure S4.** Size distribution of reads mapped to up-regulated and down-regulated C/D-box snoRNAs (SNORDs) in infected A549 cells after 0 h (non-infected), 24 h and 48 h incubation.

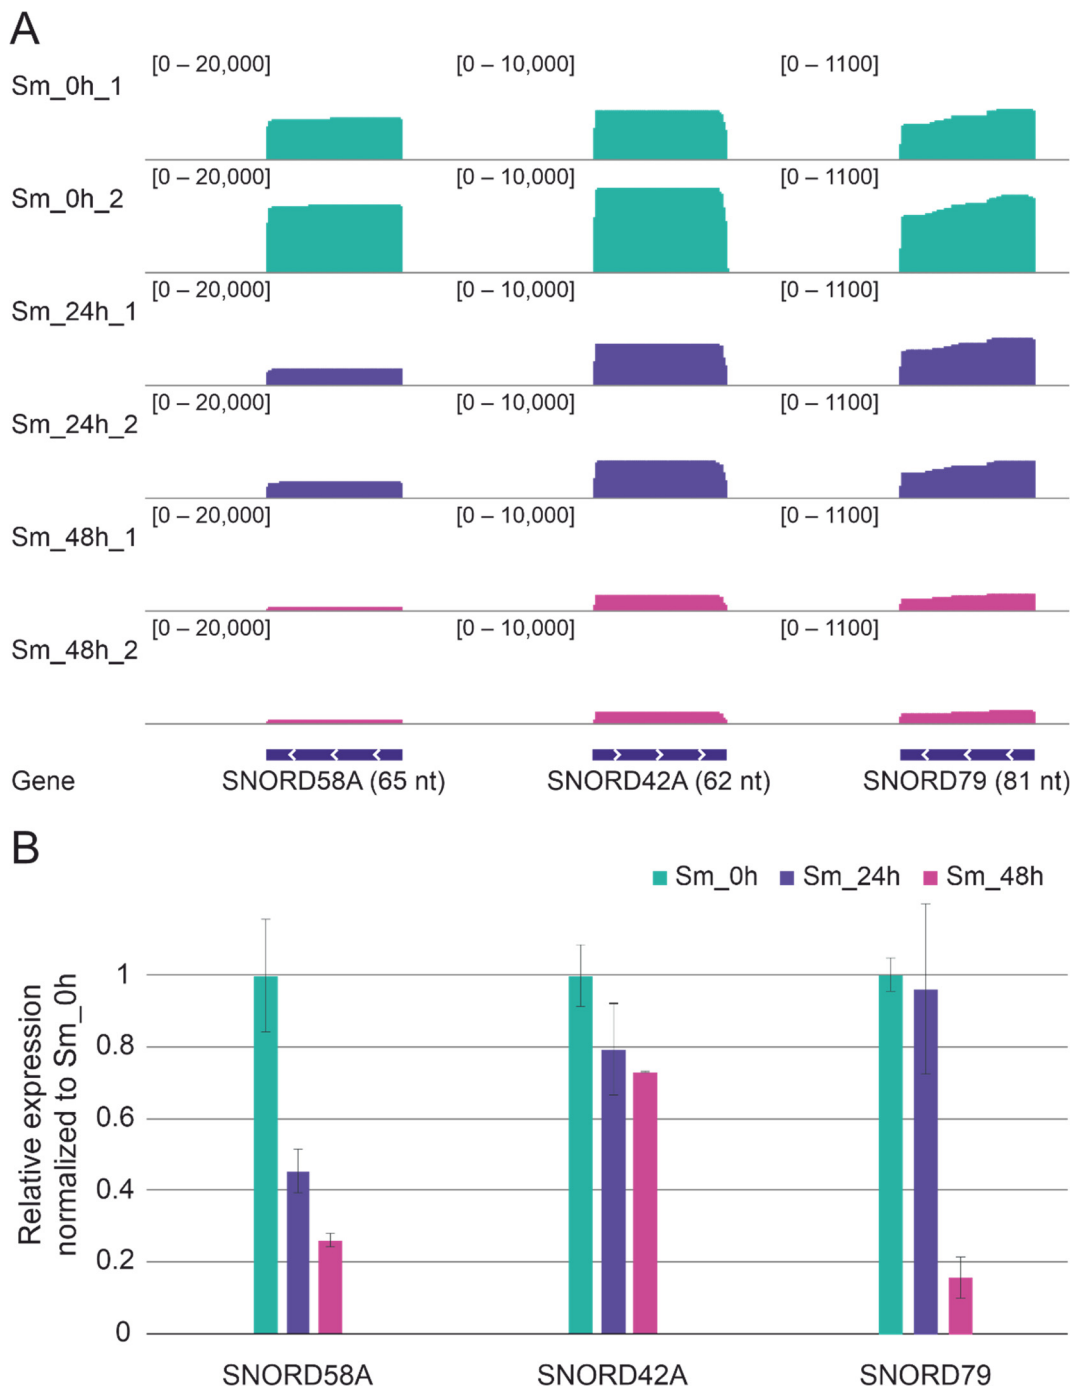

**Figure S5. A.** The coverage tracks of the aligned reads for the three small nucleolar RNAs down-regulated in response to influenza A virus infection (SNORD58A, SNORD42A and SNORD79) generated with IGV. Green reads, non-infected cells; violet reads, infected cells after 24 h incubation; pink reads, infected cells after 48 h incubation. **B.** Expression of full length SNORD58A, SNORD42A and SNORD79 measured by quantitative RT-qPCR.
